# Supplementary material for: Rational design of supramolecular hemin/G-quadruplex–dopamine aptamer nucleoapzyme systems with superior catalytic performance
Source: PubMed Central journal article supplement (PMC6005209; doi:10.1039/c5sc04832j), 2016-01-25
Supplement: SC-007-C5SC04832J-s001.pdf [file SC-007-C5SC04832J-s001.pdf]

Supporting Information

for

**Rational Design of Supramolecular Hemin/Q-Quadruplex-Dopamine Aptamer Nucleoapzyme Systems with Superior Catalytic Performance**

by

*H. Bauke Albada, Eyal Golub and Itamar Willner*

| <u>Table Of Contents</u>                                                                         | <u>page</u> |
|--------------------------------------------------------------------------------------------------|-------------|
| <b>Oxidation of ABTS<sup>2-</sup> to ABTS<sup>-</sup> by nucleoapzyme structures 3t–9t .....</b> | <b>2</b>    |
| <b>Melting curves of supramolecular nucleoapzymes 6t and 6r .....</b>                            | <b>2</b>    |
| <b>Computational simulations of the 5r and 6r systems .....</b>                                  | <b>3</b>    |
| <b>Computational simulations of the 7t, 8t, and 9t systems.....</b>                              | <b>3</b>    |
| <b>Saturation kinetics curves for the three different states in the switchable system .....</b>  | <b>4</b>    |
| <b>CD spectroscopic analysis of the switching event from 4tx/7 + 6 to 4tx/6 + 7/8.....</b>       | <b>5</b>    |

### Oxidation of $\text{ABTS}^{2-}$ to $\text{ABTS}^{\bullet-}$ by nucleoapzyme structures **3t–9t**

The oxidation of  $\text{ABTS}^{2-}$  to its radical anion  $\text{ABTS}^{\bullet-}$  was performed in a microtiterplate (BioTek Hybrid H1 platereader). Kinetics of the oxidation reactions were followed by monitoring the appearance of the radical anion ( $\text{ABTS}^{\bullet-}$ ) at 414 nm over a time-period of 10 min. Reactions were initiated by the addition of  $\text{H}_2\text{O}_2$  (100  $\mu\text{M}$ ) to the  $\text{ABTS}^{2-}$  (50  $\mu\text{M}$ ) solution in the presence of the various nucleoapzyme systems. The measurements were performed in duplicate.

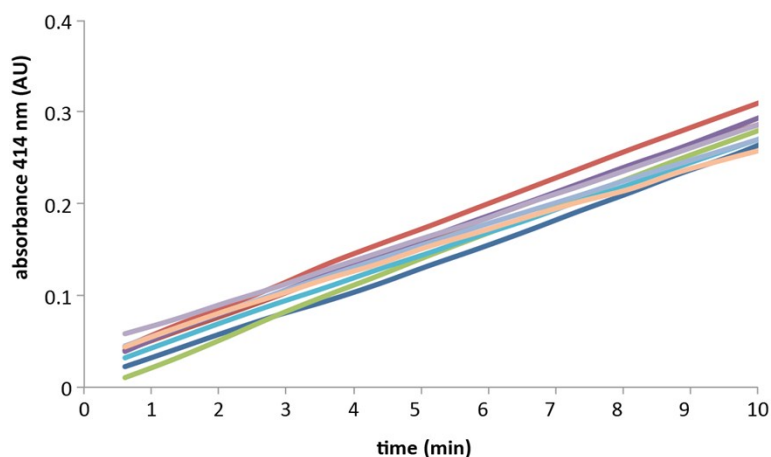

**Figure S1.** Time-dependent increase in the absorbance of  $\text{ABTS}^{\bullet-}$  as a result of the supramolecular nucleoapzyme-catalysed  $\text{H}_2\text{O}_2$ -mediated oxidation of  $\text{ABTS}^{2-}$ .

### Melting curves of supramolecular nucleoapzymes **6t** and **6r**

Thermal denaturation profiles for **6t** and **6r** were measured using 1  $\mu\text{M}$  DNA in 50 mM MES buffer (pH = 5.5, 200 mM KCl, 2 mM  $\text{MgCl}_2$ ). The temperature was raised with 1  $^\circ\text{C}/\text{min}$ . For both systems, two melting points were observed:  $T_{m,1}$  43  $^\circ\text{C}$  (for **6t** and **6r**), and  $T_{m,2}$  = 60  $^\circ\text{C}$  (for **6r**) and  $T_{m,2}$  = 64  $^\circ\text{C}$  (for **6t**). The first melting point is assigned to the dissociation of the small hairpins in the DBA unit, the second melting point is assigned to the dissociation of the larger double-strand DNA unit that is applied to merge the GQ unit and the DBA unit L/L'. The presence of the five triplex-forming bases in **6t** stabilize this interaction, when compared to the non-stabilized system **6r**, leading to the higher observed melting point.

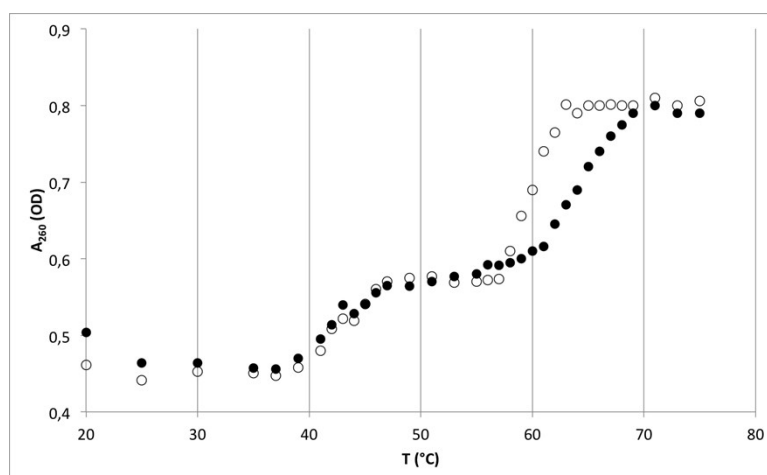

**Figure S2.** UV melting profile of **6t** (solid circles) and **6r** (open circles) at 260 nm in 50 mM MES, pH = 5.5, 200 mM KCl, 2 mM  $\text{MgCl}_2$ . Concentration DNA = 1  $\mu\text{M}$ .

Computational simulations of the **5r** and **6r** systems

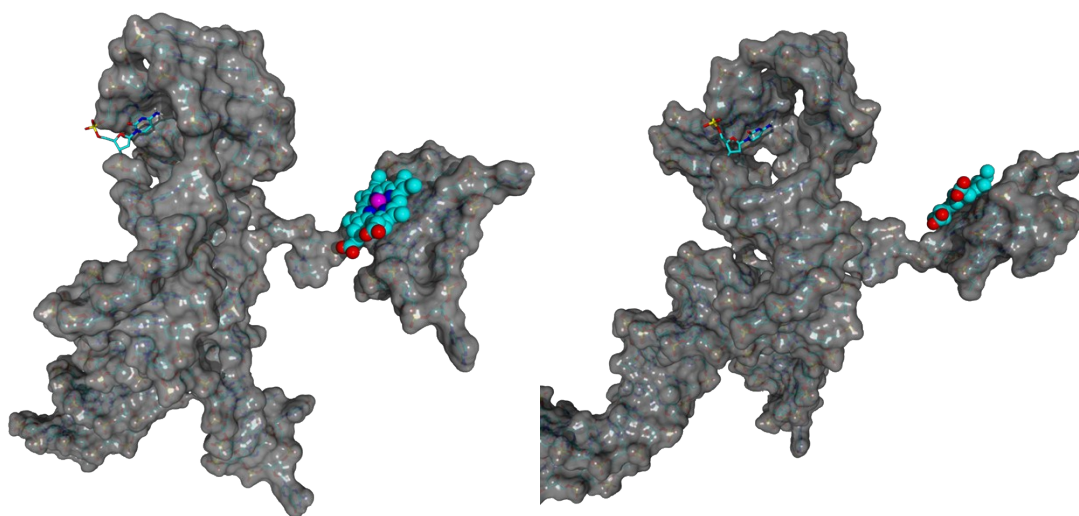

**Figure S3.** Models of non-stabilized supramolecular system systems **5r** (*left*) and **6r** (*right*).

Computational simulations of the **7t**, **8t**, and **9t** systems

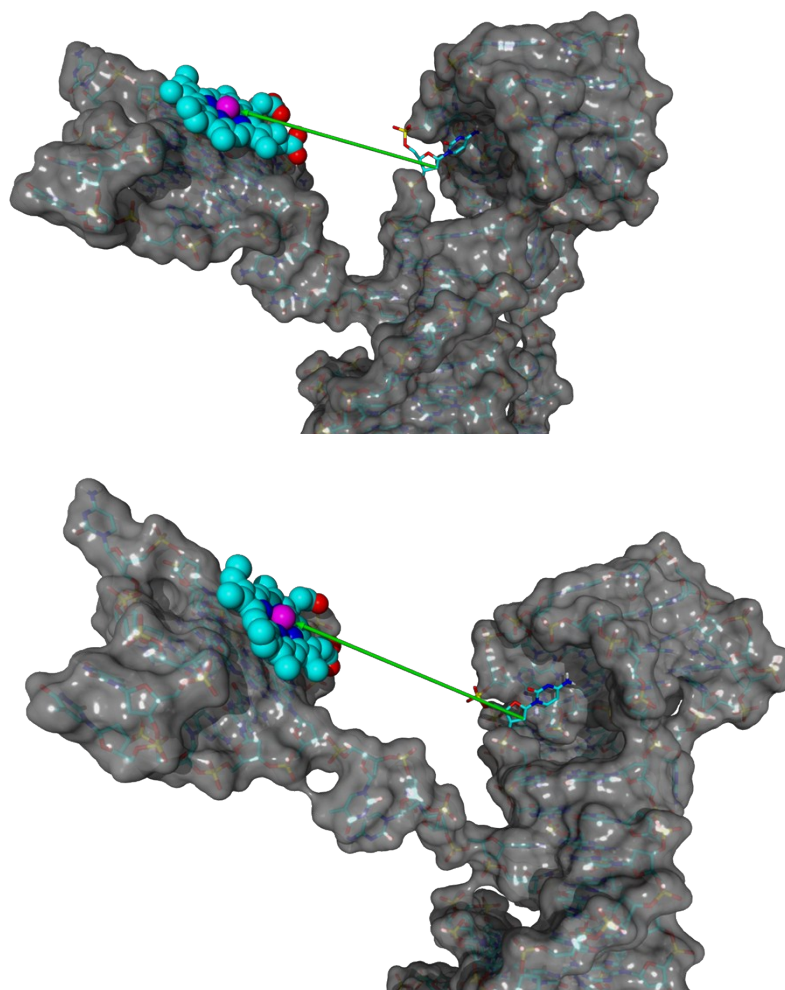

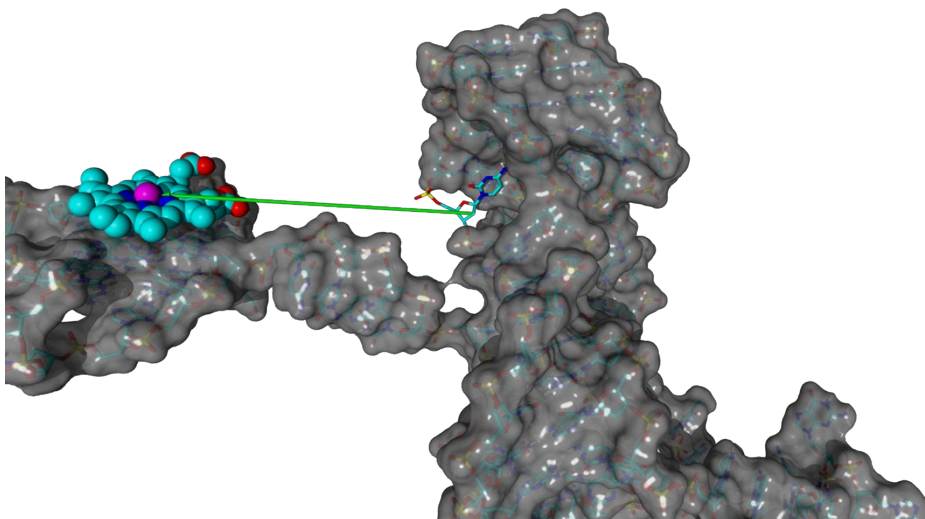

**Figure S4.** Models of triplex-stabilized supramolecular system systems **7t** (*top*), **8t** (*middle*), and **9t** (*bottom*). Lengths of the arrows are: 25 Å, 29 Å, and 33 Å, for **7t**, **8t**, and **9t**, respectively.

Saturation kinetics curves for the three different states in the switchable system

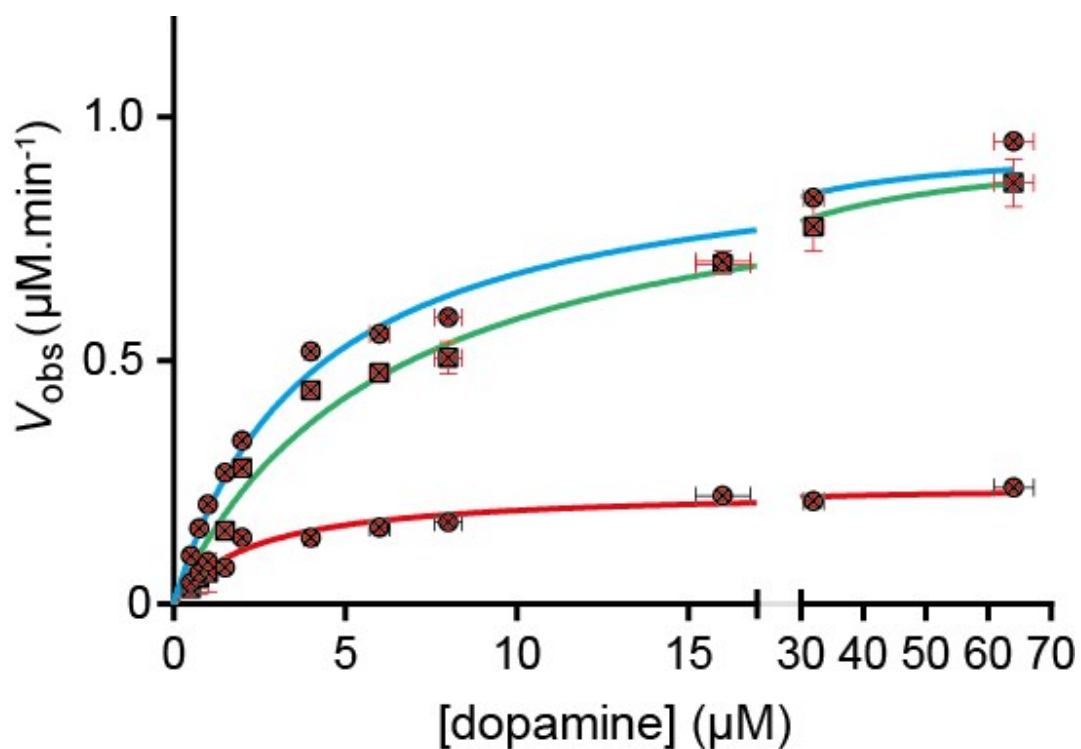

**Figure S5.** Kinetics curves of the switchable supramolecular nucleopzyme system **4tx/6** (*blue*), separated entities **4tx/7** and **6** (*red*), and system **4tx/6** in the presence of duplex **7/8** (*green*).

**Tables S1.** Kinetic parameters of the various supramolecular nucleopzyme structures with respect to the oxidation of dopamine (**1**) to aminochrome (**2**) in the presence of H<sub>2</sub>O<sub>2</sub>.

| System      | $k_{\text{cat}}$ ( $10^{-3} \text{ s}^{-1}$ ) <sup>a</sup> | $K_{\text{M}}$ ( $\mu\text{M}$ ) | $V_{\text{max}}$ ( $\mu\text{M}\cdot\text{min}^{-1}$ ) | $k_{\text{cat}}/k_2^b$ |
|-------------|------------------------------------------------------------|----------------------------------|--------------------------------------------------------|------------------------|
| 4tx/6       | $21.3 \pm 0.5$                                             | $4.0 \pm 0.3$                    | $0.95 \pm 0.02$                                        | 23.7                   |
| 4tx/7       | $5.3 \pm 0.2$                                              | $2.3 \pm 0.3$                    | $0.24 \pm 0.01$                                        | 5.9                    |
| 4tx/6 + 7/8 | $21.2 \pm 0.7$                                             | $6.2 \pm 0.7$                    | $0.95 \pm 0.03$                                        | 23.6                   |

*Conditions:* 0.5–64  $\mu\text{M}$  dopamine, 100  $\mu\text{M}$  H<sub>2</sub>O<sub>2</sub>; 0.74  $\mu\text{M}$  active catalyst; buffer: 50 mM MES, pH = 5.5, 200 mM KCl, 2 mM MgCl<sub>2</sub>. *Notes:* <sup>a</sup>  $k_{\text{cat}} = V_{\text{max}} / [\text{catalyst}] = V_{\text{max}} / 0.74$ . <sup>b</sup> the rate constant for the hGQ DNAzyme (**1**) is:  $k_2 = (0.9 \pm 0.1) \cdot 10^{-3} \text{ s}^{-1}$ .

We note that for the system **4tx/6** and **4tx/6 + 7/8** the  $K_{\text{M}}$  values differ by ca. 50% while all other kinetic parameters are similar ( $k_{\text{cat}}$ ,  $V_{\text{max}}$ ). This apparent difference in the  $K_{\text{M}}$  values is attributed to the fact that dopamine reveals non-specific affinity towards duplex DNA (in this case dsDNA **7/8**). Since  $K_{\text{M}}$  values are predominantly determined by the rates ( $v$ ) at relatively low concentrations of dopamine, this non-specific binding of dopamine in the **4tx/6 + 7/8** mixture leads to a lower substrate concentration for the nucleopzyme at these lower concentrations, and thus to a higher  $K_{\text{M}}$  value. This fact is, also, reflected by the lower  $V_{\text{obs}}$  values for the **4tx/6 + 7/8** system when compared to the **4tx/6** system alone, specifically at the lower dopamine concentration regiment (at  $\leq 8 \mu\text{M}$  dopamine). At high concentrations of dopamine (at  $\geq 16 \mu\text{M}$  dopamine), at which the  $V_{\text{max}}$ -values are calculated, this side-effect binding is negligible, leading to similar  $V_{\text{max}}$  values of the two systems.

#### CD spectroscopic analysis of the switching event from **4tx/7 + 6** to **4tx/6 + 7/8**

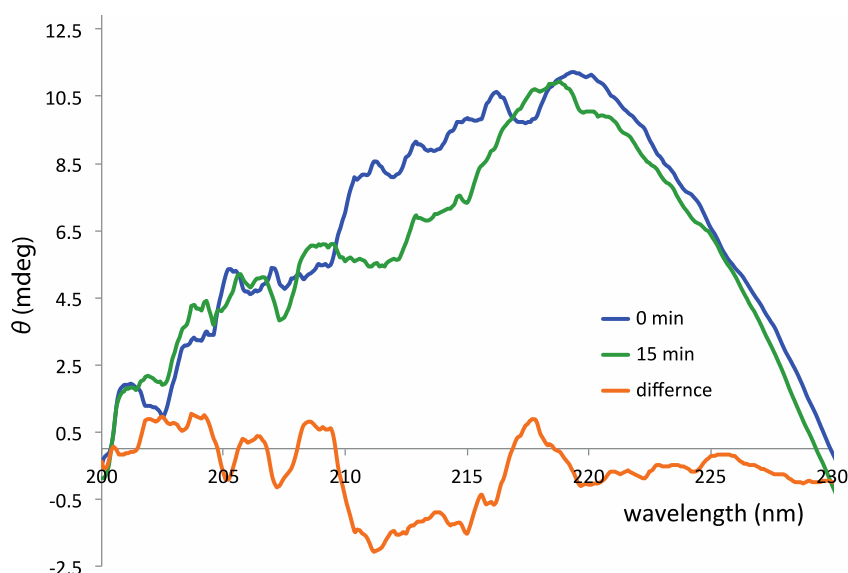

**Figure S6.** CD spectra of **4tx/6 + 7/8** obtained 0 and 15 min after addition of “ON” switch (**8**) to the mixture of **4tx/7 + 6**. Appearance of the negative feature around 213 nm shows the time-dependent formation of the triplex feature.
